# Supplementary material for: The Effectiveness of an Educational Game for Teaching Optometry Students Basic and Applied Science
Source: PLoS One. 2016 May 27;11(5):e0156389. doi: 10.1371/journal.pone.0156389 (PMC4883760; doi:10.1371/journal.pone.0156389)
Supplement: S1 Data — (XLSX) [file pone.0156389.s001.xlsx]

## Sheet: exam
GAMERS						NON-GAMERS
#	exam1	exam2				#	exam3	exam4
1	35	38				22	33	38
2	28	31				23	31	38
3	25	31				24	26	34
4	24	36				25	25	32
5	22	29				26	24	31
6	21	32				27	23	30
7	21	33				28	21	32
8	19	30				29	21	28
9	19	29				30	19	31
10	26	30				31	25	27
11	21	29				32	12	24
12	22	27				33	16	28
13	22	25				34	22	30
14	35	37				35	28	35
15	27	30				36	26	28
16	20	26				37	19	32
17	23	33				38	26	34
18	23	30				39	18	27
19	16	26				40	35	36
20	20	30				41	24	32
21	30	33				42	28	33

## Sheet: opinion
GAMERS
Subject	q1	q2	q3	q4	q5	q6
1	4	5	4	5	5	5
2	5	5	2	5	5	5
3	4	5	3	5	5	5
4	5	5	1	4	4	5
5	4	5	3	4	5	4
6	5	5	1	5	5	5
7	5	5	2	5	5	5
8	5	5	3	5	5	5
9	5	5	2	5	5	5
10	4	4	2	5	4	4
11	3	4	4	4	4	4
12	4	4	2	4	4	4
13	4	5	2	5	5	5
14	5	5	2	5	5	5
15	4	4	2	4	3	4
16	3	4	2	4	4	4
17	4	4	3	4	4	4
18	5	5	5	5	5	5
19	4	4	4	4	4	4
20	4	5	3	5	4	4
21	4	5	4	5	5	4
NONGAMERS
22	5	5	4	4	5	5
23	4	4	1	5	5	5
24	4	4	1	4	4	4
25	4	5	2	5	4	5
26	4	5	4	5	5	5
27	5	5	1	4	5	5
28	4	4	2	5	4	4
29	4	4	2	5	4	4
30	4	5	2	4	5	5
31	4	5	2	5	5	4
32	5	5	3	4	4	5
33	2	4	4	4	4	3
34	4	5	2	5	4	4
35	4	4	2	5	5	4
36	5	5	2	5	5	5
37	4	4	3	4	3	4
38	3	4	2	5	5	4
39	4	5	2	5	4	4
40	3	5	2	5	5	5
41	3	4	3	4	4	4
42	4	4	2	5	5	5
